# Supplementary material for: Obstetric and neonatal outcomes, antiseizure medication profile, and seizure types in pregnant women in a vulnerability state from Brazil
Source: PubMed Central journal article supplement (PMC10984515; doi:10.1371/journal.pone.0291190), 2024-04-01
Supplement: pone.0291190.s001.pdf [file pone.0291190.s001.pdf]

S1Table. Profile of ASM used in Pregnant Women With Epilepsy (PWWE)  
(n=229)

| <b>Drug Treatment</b>                                     | <b>N</b> | <b>%</b> |
|-----------------------------------------------------------|----------|----------|
| <b>Oxcarbazepine</b>                                      |          |          |
| Levetiracetan                                             |          |          |
| No                                                        | 229      | 100,0    |
| <b>Others drugs</b>                                       |          |          |
| yes                                                       | 26       | 11,1     |
| no                                                        | 208      | 88,9     |
| <b>Missing data</b>                                       | 4        | 1,7      |
| <b>Carbamazepine,<br/>Phenobarbital and<br/>Phenytoin</b> | 2        | 1,0      |
| no                                                        | 195      | 99,0     |
| total                                                     | 197      | 100,0    |
| <b>Carbamazepine<br/>and Phenobarbital</b>                |          |          |
| yes                                                       | 18       | 9,1      |
| no                                                        | 178      | 90,9     |
| total                                                     | 197      | 100,0    |
| <b>Carbamazepine<br/>and Phenytoin</b>                    |          |          |
| yes                                                       | 4        | 2,0      |
| no                                                        | 193      | 98,0     |
| total                                                     | 197      | 100,0    |
| <b>Carbamazepine<br/>and Diazepam</b>                     |          |          |
| yes                                                       | 13       | 6,6      |
| No                                                        | 184      | 93,4     |
| total                                                     | 197      | 100,0    |
| <b>Phenytoin and<br/>Diazepam</b>                         |          |          |

|                                       |          |          |
|---------------------------------------|----------|----------|
| yes                                   | 6        | 3,0      |
| <hr/>                                 |          |          |
| <b>Drug Treatment</b>                 | <b>N</b> | <b>%</b> |
| <hr/>                                 |          |          |
| no                                    | 191      | 97,0     |
| total                                 | 197      | 100,0    |
| <b>Phenobarbital and Diazepam</b>     |          |          |
| yes                                   | 17       | 91,4     |
| no                                    | 180      | 8,6      |
| total                                 | 197      | 100,0    |
| <b>Valproicacid and Diazepam</b>      |          |          |
| yes                                   | 6        | 3,0      |
| no                                    | 191      | 97,0     |
| total                                 | 197      | 100,0    |
| <b>Phenobarbital and Phenytoin</b>    |          |          |
| yes                                   | 13       | 6,6      |
| no                                    | 184      | 93,4     |
| total                                 | 197      | 100,0    |
| <b>Phenobarbital and Valproicacid</b> |          |          |
| yes                                   | 12       | 6,1      |
| no                                    | 185      | 93,9     |
| total                                 | 197      | 100,0    |
| <b>Lamotrigine and Valproic acid</b>  |          |          |
| yes                                   | 6        | 3,0      |
| no                                    | 191      | 97,0     |
| total                                 | 197      | 100      |

source: author's own production
