# Supplementary material for: Obstetric and neonatal outcomes, antiseizure medication profile, and seizure types in pregnant women in a vulnerability state from Brazil
Source: PubMed Central journal article supplement (PMC10984515; doi:10.1371/journal.pone.0291190), 2024-04-01
Supplement: pone.0291190.s002.pdf [file pone.0291190.s002.pdf]

S2 Table. Regression analysis between neonate outcomes and ASM used in monotherapy (n=115)

| Monotherapy          | Stillbirth           | Neonatal ICU | Neonatal heart disease | Premature Delivery <37weeks | Lowbirth weight      |
|----------------------|----------------------|--------------|------------------------|-----------------------------|----------------------|
|                      | OR [IC95%]           | OR [IC95%]   | OR [IC95%]             | OR [IC95%]                  | OR [IC95%]           |
| <b>Phenobarbital</b> | 0.62<br>[0.12; 3.25] | NA           | NA                     | 0.60<br>[0.24; 1.48]        | 0.90<br>[0.33; 2.43] |
| <b>Valproicacid</b>  | 3.43<br>[0.34;34.22] | NA           | NA                     | 3.68<br>[0.69; 19.52]       | NA                   |
| <b>Carbamazepine</b> | 1.51<br>[0.26; 8.75] | NA           | NA                     | 1.24<br>[0.45; 3.40]        | 2.42<br>[0.86;6.77]  |
| <b>Phenytoin</b>     | NA                   | NA           | NA                     | NA                          | NA                   |
| <b>Diazepam</b>      | NA                   | NA           | NA                     | NA                          | NA                   |
| <b>Lamotrigine</b>   | NA                   | NA           | NA                     | 2.34<br>[0.37; 14.90]       | NA                   |

Source: author's own production  
Reference: no outcomes presents

NA: It was not possible to perform this analysis.
