# Supplementary material for: Obstetric and neonatal outcomes, antiseizure medication profile, and seizure types in pregnant women in a vulnerability state from Brazil
Source: PubMed Central journal article supplement (PMC10984515; doi:10.1371/journal.pone.0291190), 2024-04-01
Supplement: pone.0291190.s003.pdf [file pone.0291190.s003.pdf]

S3 Table. Regression analysis between obstetric and neonatal outcomes and ASM in polytherapy (N=229)

| Polytherapy                            | PrH                  | Oligohydramnios       | Miscarriage          | Maternal ICU         | Preeclampsia/Eclampsia | Stillbirth           | Neonatal heart disease | Neonatal ICU          | Premature Delivery <37weeks | Low birthweight      |
|----------------------------------------|----------------------|-----------------------|----------------------|----------------------|------------------------|----------------------|------------------------|-----------------------|-----------------------------|----------------------|
| <b>Carbamazepine and Phenobarbital</b> | 0.54<br>[0.11; 2.67] | NA                    | 0.60<br>[0.15; 2.34] | 1.85<br>[0.54; 6.26] | NA                     | 0.56<br>[0.06;5.05]  | NA                     | 1.82<br>[0.15; 21.33] | 0.82<br>[0.23; 2.91]        | 1.17<br>[0.32;4.27]  |
| <b>Carbamazepine and Diazepam</b>      | 0.86<br>[0.16; 4.40] | 1.83<br>[0.17; 19.13] | 0.23<br>[0.02;1.94]  | 2.11<br>[0.55; 8.00] | NA                     | NA                   | 2.79<br>[0.23; 33.26]  | NA                    | 1.30<br>[0.35; 4.82]        | 1.85<br>[0.48;7.04]  |
| <b>Phenobarbital and Valproic acid</b> | 1.78<br>[0.41; 7.67] | 2.03<br>[0.19; 21.31] | 0.87<br>[0.27; 4.65] | 0.80<br>[0.15; 4.07] | 2.03<br>[0.19; 21.31]  | NA                   | 3.09<br>[0.25; 37.04]  | NA                    | 2.33<br>[0.64; 8.43]        | 3.37<br>[0.90;12.62] |
| <b>Phenobarbital and Diazepam</b>      | 1.05<br>[0.25;4.28]  | NA                    | 0.65<br>[0.16; 2.57] | 2.04<br>[0.59;6.98]  | 1.29<br>[0.12; 13.26]  | 0.61<br>[0.06;5.48]  | NA                     | 1.96<br>[0.16; 23.09] | 2.81<br>[0.87; 8.99]        | 1.30<br>[0.35;4.77]  |
| <b>Lamotrigine and Valproic acid</b>   | 2.66<br>[0.43;16.22] | NA                    | 0.64<br>[0.07; 5.88] | NA                   | 4.86<br>[0.42; 55.71]  | 2.33<br>[0.23;23.34] | NA                     | 7.40<br>[0.56; 96.26] | 0.68<br>[0.07; 6.51]        | 0.91<br>[0.09;8.82]  |

Source: author's own production

NA: It was not possible to perform this analysis.
