# Supplementary material for: Obstetric and neonatal outcomes, antiseizure medication profile, and seizure types in pregnant women in a vulnerability state from Brazil
Source: PubMed Central journal article supplement (PMC10984515; doi:10.1371/journal.pone.0291190), 2024-04-01
Supplement: pone.0291190.s004.pdf [file pone.0291190.s004.pdf]

S4 Table. Univariable and multivariable adjusted logistic regression analysis of obstetric and neonatal outcomes between PWWE using and not using ASM, and ASM in monotherapy and polytherapy(n=229)

| Dependent Variables                                                           | Univariable analysis |            |             |            | Analysis with adjustment for age, type of delivery, marital status, place of birth |            |             |            |
|-------------------------------------------------------------------------------|----------------------|------------|-------------|------------|------------------------------------------------------------------------------------|------------|-------------|------------|
|                                                                               | Monotherapy          |            | Polytherapy |            | Monotherapy                                                                        |            | Polytherapy |            |
|                                                                               | OR                   | IC 95%     | OR          | IC 95%     | OR                                                                                 | IC 95%     | OR          | IC 95%     |
| <b>Obstetric outcomes (PrH, vaginal bleeding, preeclampsia and eclampsia)</b> | 1.89                 | 0.71; 5.01 | 1.13        | 0.40; 3.19 | 1.90                                                                               | 0.68; 5.28 | 0.94        | 0.31; 2.84 |
| <b>Neonatal outcomes (Stillbirth and MCM)</b>                                 | 1.12                 | 0.22; 5.56 | 1.84        | 0.37; 9.06 | NA                                                                                 | NA         | NA          | NA         |

Source: author's own production  
Reference: pregnant women with epilepsy not taking ASM

NA: It was not possible to perform this analysis.
